# Supplementary material for: Early Evidence That Soil Dryness Causes Widespread Decline in Grassland Productivity in China
Source: MDPI journal article supplement (doi:10.3390/land12020484), 2023-02-15
Supplement: s1 [file s1]

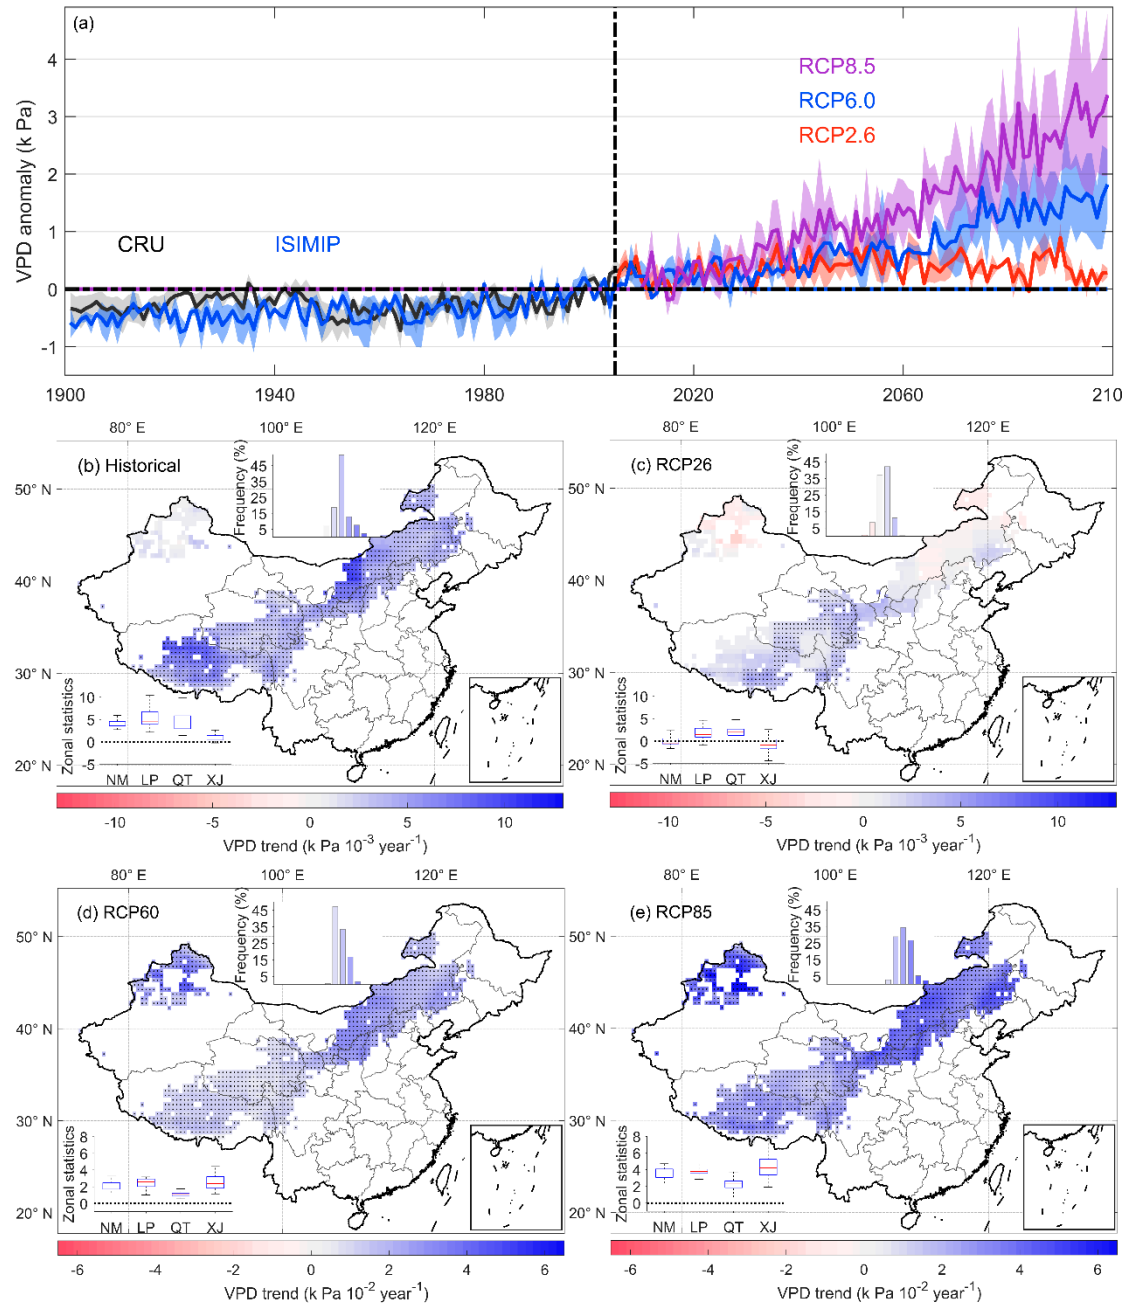

Supplementary Figure 1. Spatial and temporal variability of annual mean vapour pressure deficit (VPD) based on process model simulations. (a) represents the long-term dynamics of VPD over two centuries in China's grasslands, and the VPD anomalies in all datasets are relative to the distance level during 2006-2015. The ISIMIP (simulated, blue line) and CRU (observed, black line) datasets provide VPD changes for the historical period (1901-2005), respectively. ISIMIP also provides VPD changes for the future period (2006-2099) VPD projections for different emission scenarios (RCP2.6, RCP6.0, and RCP8.5), and the line colors in the figure correspond to the annotation colors. The black short-wave vertical line is the 2005 cut-off line, and the dash shading represents the doubled standard deviation between the four models. (b-e) indicates the spatial pattern of VPD trends in China grasslands under different climate scenarios in the past (b) and in the future (c-e). VPD units are  $\text{k Pa } 10^{-3} \text{ year}^{-1}$  for the historical and RCP2.6 scenarios and  $\text{k Pa } 10^{-2} \text{ year}^{-1}$  for the RCP6.0 and RCP8.5 climate scenarios. black dots in the figure represent significance tests passed at  $P < 0.05$ .
